# Supplementary material for: Identification of novel Arabidopsis thaliana upstream open reading frames that control expression of the main coding sequences in a peptide sequence-dependent manner
Source: PubMed Central journal article supplement — Nucleic Acids Res. 2015 Jan 23;43(3):1562–76. doi: 10.1093/nar/gkv018 (PMC4330380; doi:10.1093/nar/gkv018), 2015-01-23
Supplement: supp_gkv018_nar-02126-z-2014-File009.pdf [file supp_gkv018_nar-02126-z-2014-File009.pdf]

# Supplementary Figure S1

## A ANAC082

1 GTTCTGGCTCGTCCTTCACGCCACTCTCTCCTATATCTCTCTCTCGCTCTCCTCCCCCTT  
61 TCCGCCGATCGTCCTTTCCCCACCGTCGAGTTTTTCCCTATCCATCTCCGGGCTTTACGT  
121 TGCACACCAG**ATGTCTGTTGATCTCTGCAAGAAGAATCCATCTTTTCTTTGGTGTGACTG**  
M S V D L C K K N P S F L W C D C  
M S V D L C K K N P S F L W C D C  
↓  
181 **TGGTTATATGAGCAGGGGAGGTTGTGGTGTTTTCAGATTATCCTCTTCAGGCACTGGAC**  
G Y M S R G R L W C F Q I I L F R H W T  
G Y M S R G E V V V F S D Y P L Q A L T  
241 **TTGACTTGTCTTCAATTCCTCGACTTCTCTCTTTTCTTCTCTCTCTCTCTTTTCTCG**  
\*  
\*  
301 TTTCTCTGTTTTTTTTTTCTGCTTGATTTGATCAAAGGGTATTCGTTTTCTGCTGCTCCTG  
361 TTTACTGTGAACCTGAAGACTAAGTTTTCTTTGCTAAACTCTCACTTTACTGGTGAAGAG  
421 TTTACAGAAGATTGTTCAAAGTTTTCCCCTTTGGATTCTTCGCCA**ATGGGGAA**

## B ANAC096

1 TTAGGAAAAATCATTCTTAATCACTCTCGAAGCTTTCACACCAATATTACTTCTTACT  
61 ACATCTCTTCATTTTAAAGATTTGTTAGTTACTTTTTTTTTTTTGTATTGTACGAAATAA  
↓ A ↑ G  
121 TTTGTTTTCTTTTCAGACA**ATGTTCTTGT**CACACA**AGAATA**CAATCGACT**TTGACTTGCAA**  
M F L S H K E Y N R L D L Q  
M F L V T Q R I Q S T G L A I  
181 **TTTTTCTAAACAACAATCCAGCATCGAGAAAAGTTTCTATTTTTGGATTTTCCAAATA**  
F F L N N K S S I E K S F Y F W I F Q I  
F S K Q Q I Q H R E K F L F L D F P N I  
241 **TTAACAGTTATAGCTTTCGTGACTTCAAGAAATATCCATTTCAAGATTATTTAACCTTTTT**  
L T V I A S \*  
N S Y S S \*  
301 TTGTCTAGCAAGTCATCGTATTCTACTTTGTTGTTGCAA**ATGGGAAGTTCATG**



## E CIPK6

1 ATCCGACGGCAAAAAGGAGAATTAAGATTTTTAACTTTAAACGAGAGTTTCGTTTATTTAC  
61 TCAAAAATTTACTTCTGAAATCTCTATTTGAATTTTCGGGGAAAAAATCCTAAGTAAGGG  
121 AATGCAGAGAG**ATGGTCGGAGTATCGCCGGTGAAGACTAAGCTGTGTGATCGGTTTAACC**  
M V G V S P V K T K L C D R F N R  
M V G V S P V K T K L C I G L T  
181 **GATCCGTCGGCGGCAGGAATTGCCACCGGAAACACGTCGAGGACGGGTGATCCAGTTTTTC**  
S V G G R N C H R K H V E D G \*  
D P S A A G I A T G N T S R T G \*  
241 TAAACTCTCGTCTCTCGAATTCTTCGAAGATATCGAAAACTGTAAATCTTTTTTTTCTT  
301 CTACTTTTTTACAAAATTTCTCTAATCATCGTTGTAAAGTAAAAACC**ATGGTCGGAGCAA**  
361 **AACCGGTGGAGAATGGATCTGACGGTGGTAGTAGTACG**

## F CIPK23

1 TAATTTAACTTTTAAATTCCTTCCACCATCGAATCACAACTCTCTCTCTCTCGCTTGCT  
61 GTTACTCGCTTTTTCCAGAACCGGCTTCGATTTTTCTAAAGCAGCCGAAATTTACGATT  
121 CCCAGAATTTTCCCTACTGACAAAATTTCACTTCAAATACAAATCTCGTCTTCATGAGTC  
181 TTCTTCTTCGTCCAAATTGAATTTCTCCGCACACGAGAGTTGAATTTTGATTTTCGGCT  
241 GTTTATATGGTCTCCGGTCCCTTAGGGTTTTAATTCTTCTGCAGATCTCTCAC**ATGAGC**  
M S  
M S  
301 **GTTGCGAAATCCCAAGTATGGCAGCCATGCAAGAAGAAGAGGTCCTCCTCCTGA**TTCAAT  
V A K S Q V W Q P C K K K R S S S \*  
V A K S Q V W Q P C N E E E V L S \*  
361 **AGAGATCTATCTATATATATAAGAGACCGAGATATATATATAGAGAGAGAG****ATGGCTT**  
421 **CTCGAACAACGCCTTCACGATCG**

## G *DIC1*

1 AATCTCACCTTCTCTCTCCCTCTCTATAACAAACATTAATACACACACCAAAAAAAAAACC

61 TGT**T**ATGTCTCAAAGATCTCTGATTCCTCATTCTTCTTCTATAGCTTTTGGTCTCCATT  
M S Q R S L I P H S S S I A F G L H S  
M S Q E I S D S S F F F Y S F W S P F

121 CTCATCTCTTAATCTCCAGTGAGATCAGCTCCAATTCTAACTGGTCTCTCTAAATAAAAA  
H L L I S S E I S S N S N W S L \*  
S S L N L S E I S S N S N W S L \*

181 ACAGAAATAAAAAATCCAACCTTTTTCAATTTTCGTTCAATTTTCCCGGAAAAAAAAAGCGA

241 TCCTTTTGATTTTTCGATTTCTCCAAGTAACAATTCAAAATGGGTCTAAAGGGTTTTGCT

301 GAAGGAGGAATAGCTTCG

## H *OTLD1*

1 GACGGTTTAAAAAAAAAAAAAAAAACATTTCTCTCAATTTTTTTTTTCAATCAAACAAAAAA

61 AATCATCGCTCCCAATTTTACATTCTTCTTCTCGCCAAACCCTAATTGTTTCGATTTCTG

121 CTACATTCTTCCGAAACTTGTCTATCTCTGACGGATCTCGAATCGGTATTCTCAGCTG

181 CTGAAATCTCCGGGAAATGCAGAGAACGTTTTGCTGCGAGGTGGAGAACGGTTGGAAGGA  
M Q R T F C C E V E N G W K E  
M Q R T F A A R W R T V G R N

241 ATCCCTCTCTCAAGGGATTGTTATCGT**T**AGGTCCTAAAGCAAGAAGCTAGGGACAAACCTTG  
S L S Q G I V I V G P K A R T R D K P W  
P S L K G L L S L V L K Q E L G T N L G

301 **A**GGATATTCTCTAACTTTTCATCTTTGATTAGGACAGCAAAGACTTAAGAAGCAGC**ATGAC**  
D I L \*  
N I L \*

361 TCGGATTTTGGTTCAAAGAGGTTTCATCAGGCAGTTCTTCCAAC

# I *At1g67480*

1 ACGAAGCAGAAGACAGAACCCAAAAACCGACAAAGTTCCCCTATTCTCTCGAAAATTCAT  
61 TACTTCTAAAGATGGATGTTGTAGGTGGCTGATGACTCTTCTCCCTAGC**ATGACCTTTA**  
M T F I  
M T F I  
121 **TTGATACAGAGATGTGTATGAGAAGAAACAACATCAATTTAACACAGTCATAGATTCTA**  
D T E M C M R R N N I N L T T V I D S N  
D T E M C M R R N N I N L T T V I D S N  
181 **ACGAAGCCATTGGTATGGAACATGAATTAGATTCTGCTAGACATCAATATTCTTCAGTGC**  
E A I G M E H E L D S A R H Q Y S S V L  
E A I G M E H E L D S A R T S I F F S A  
241 **TCACTGCAATTCCATTCTTCTCCGCTACATTGTTTATTCCCTCTCTCTTTGAAAATCACTA**  
T A I P F F S A T L F I P L S L K I T I  
H C N S I L L R Y I V Y S S L F E N H Y  
301 **TACGTGACGGGTTTCACGAAAGTCTTTAA**TAACATTTCCATACACAAAACACAAATAGTT  
R D G F H E S L \*  
T D G F H E S L \*  
361 TAGAGATTTGTTCTTAGGGAGATTTAGCTATCTCTCTGTTCAAAAAGATTGGTCTAAAG**AT**  
421 **GCAAGCTTTTGCTTTAAGTGGGAAGAAAAGGATTGTGAATCACGGCATGTG**

# J *At3g15430*

1 GATTTCAATTGTACGTTTTTCAATCGAAAGTTTTCTCCTTTTTGAGGGATTTGTTTAGTT  
61 TGATTGATTGTGGATTGTTCTGTTCTTCGTTGCAGTTCGAAGAATCTGGCGTGTTCAGGT  
121 GGATTGATTCTTGCGATCTGACCCTTCT**ATGATTAGTTTCCGATCTTCGAATAGACCAA**  
M I S F R S S N R P T  
M I S F R S S N R P N  
181 **CTGCGAGATTCTCATCTATAACTCCGTTTTCTATTTCGATTTCTTATCTCTTTCTACCAT**  
A R F S S I T P F S Y S I S Y L F L P S  
C E I L I Y N S V F L F D F L S L S T I  
241 **CCAACGTGTTCTTCATACATTACTTCAATTGCTCTCGATTTGCCTCAAAATCTGAT**CCT  
N V F F I H Y F N C S R F R L K I \*  
Q R V L H T L L Q L L S I S P Q I \*  
301 CTAGTAGCTTGAAGCAACCCAAAGTCTCGTCCTTTACGTTCAATTAGGTCATTTTGAAC  
361 CCTGTTCTTAGAATTAGGAAGGGAAGAA**ATGGCTGATCGAAACTGTTTG**

## K *At3g55050*

1 CGCGACTATCGGTTTTGATTTGTATTAGTAATCATCTTGCTAATCTTTCCCCCTCATTGA  
61 TCTGAAATCGAATGATGGATTATTATTCTACTCCAAGCTTTTGAATAAGGAACCCTATT  
121 TCTTTCATCTAATCCTCGATTTTCATCAGATTAATGTTGTTTACATTTGTGAATGCGTGT  
M L F T F V N A C L  
M L F T F V N A C L  
181 TGAATTCTGAATCCTGGGTTTTGTGGAGTTGGAATTGAGTCTGACAAGAAGATTGGGTTTC  
N S E S W V C G V G I E S D K K I G F L  
N L N P G F V E L E L S L T R R L G F  
T T  
↓ ↓  
241 TTCATAATATAGTTATAAGCACTGATTTGATGAACGATTTGATAGCTGGTTCCTTTTGGTT  
H N I V I S T D L M N D L I A G S F G \*  
F I Y I V I S T D L M N D F D S W F F G \*  
301 GAGACATGTGAATTATGGTATCTACAACATTTAGGAGAATTGTATCGCCTTGTTGGAGAC  
361 CTTTTGGTATTGGAGAAGATTCTAGTCCTGGTAGTGA

## L *At4g10170*

1 ATCACAAAGATAAACATCTCAAACAAAAGCTCACACATGACCCAAGAACCCTAGAGAGA  
61 AGAAGAAGAGGAATGAGAGAATTCATCCTCGATTTTGAAGACATCGCCGAAGGATTTTGT  
M R E F I L D F E D I A E G F C  
M R D S S S I L K T S P K D F V  
121 TGGTACTTTCTTCTTCTTTGACTTTCTCTCTGACTCCATCATCTCAATTTCTCTCTTC  
W Y F L L L F D F L S D S I I S I S L F  
G T F F F S L T F S L T P S S Q F L S S  
T  
↓  
181 TTCTTTGCTCTAATCACAGACTTCTCTTCTTTCTTCTGTCTCAATTTGATTTCTTAA  
F F A L I T D F S S F L F C L N L I S \*  
S F A L I T D F S S F L F C L N L I S \*  
241 AAAAAAAGATGGGTTTAATCAAGAACACAGT

## M *At4g12790*

1 AACAAACCAAAAACTGAAGCTCTTGAAATTCCTCTCTTCTTCTTTTGCTTGAGCTTTA  
61 GGTTTGGAGAGCAAAGAAAAACGAAGACGCGTCAAAGGTACTGAAATGTGTCTATTGCTT

121 CTTGCTTCTGGTTTT**ATGGGTCCCTGCGACATTTTGAGAGTGT**TTGTTTGGTTTAGGTGTCT  
M G P C D I L R V L F G L G V W  
M G P C D I L R V I V W F R C L

181 GGTGTATTGCTTATATAACTGTTGCAATCTTTGCGTCTTT**T**AGAATCTTTCACTGTATTT  
C I A Y I T V A I F A S F R I F H C I C  
V Y C L Y N C C N L C V L R I F H C I C

241 **GTTAA**TTTCAAGAGCTTTTGTGGAGAGGTTCTGCTTGCTTGCTACA**ATGGGTACGCCCA**  
\*  
\*

301 **GCTAGTTATTGGTCCAGCAGGCAGTGGAAAGT**

## N *At5g02480*

1 TAATCCAATCTTCTTCTTACATAAACACCTCTCCTCCCCACCGTTTCCAAAAGAGAGAA  
61 GCTTCTCACTAACACCAAAAAACAAGTCTTTGAAGAAGAATAAAAAGATTGGATTTTGAT  
121 AAGTTTAGTGAAAATGGGGGAGCTTTTGTGTTCTTCACTGTGGAACCCGTCACGATTCAT  
181 TGTTGCTTCTCTCAAAGGTATTTTCTGGGTTTAGCTTCTTAGAGGTTCTTCGTTCTTAA  
241 AGGTCTGTTTTTTTTTTAGGTTGTGATACTTTGAATGTAAAAAAGGGAAGATTTTTAGTTT

301 CGAT**ATGTATATCTCTCGGATGGGTTT**GAGTCGGAGTTTCCCGCCGCTTTTTGGGGGATT  
M Y I S R M G L S R S F P P L F G G F  
M Y I S R M G L S R S F P A A F W G I

361 **TCGGAAATTCTAGGGTTAGGGTTGGATATTGTC**TTCCCTCTAGCAGTCTCTGCCACTTTT  
R E I L G L G L D I V F L \*  
S G N S R V R V G Y C L L \*

421 AAAATCTTTCATCTTTCTTTGAGAGTGAAAGAGGTTTTTTTTATTTGTTTGTGTCTTCCCT  
481 GGGAAATCGAGATTCTGGATCTTAATCAATATGTGGGTTAATTGGGAGATCTGGGATTTGG  
541 GAGATCTTGTGGTGGATTGAAGAAAAAGCAAGGTTGTAGATTTTGAAAA**ATGAAAGGTTC**  
601 **AATTCCTTACTGTTTTGTC**



# Supplementary Figure S2

## A ANAC082

|                             |                                          |
|-----------------------------|------------------------------------------|
| <i>Citrus sinensis</i>      | MSFDPSKKITSLLR--CDEGFMSRGRWCSRKFLFRHWT   |
| <i>Actinidia chinensis</i>  | MSFDPSKKHQGLLG--CALSFMSCGRLWCSLKILFRHWT  |
| <i>Populus nigra</i>        | MSFDLYETQASLLW--CAFQFMTOGRPWCSWKFLFRHWT  |
| <i>Solanum lycopersicum</i> | MSVGSSEKHHFFVW--SAFLFMNRRRLWCSGKILFRHWT  |
| <i>Triphysaria pusilla</i>  | MSFDSSEKRRFLFIW--CDFCFMNRRLWCSRKVLFWRHWT |
| <i>Zingiber officinale</i>  | MYFDLIRKEYPFWLW--CNFWFICRRRLRCSHRIIFRHWI |
| <i>Arabidopsis thaliana</i> | MSVDLCKKNPSFLW--CDGYSRGRWCFQIILFRHWT     |
| <i>Quercus petraea</i>      | MSLNLNKKQSSIIWCDFN--FMNRGRWCSWKFLFRHWT   |
| <i>Medicago truncatula</i>  | MTLYLKSRSSFSVRRHRS CFMNLGRWCSFKIVFRHWT   |
| <i>Cucumis melo</i>         | MSFELQRKISSRP---FDFCFMNRGRFWCSWKILFRHWT  |
| <i>Prunus persica</i>       | MSFDLNKHSII---GQFYFMNRGRWCSRRILFRHWT     |

## B CIPK6

|                             |                                      |
|-----------------------------|--------------------------------------|
| <i>Glycine max</i>          | MRG-FRLKRTEL-SGEAKRRI-GGRNCHRKHVEDG  |
| <i>Lactuca virosa</i>       | MSGDSRLSN---RGRAKRPI-GGRNCHRKHVEDG   |
| <i>Citrus clementina</i>    | MRG-PSWRLPEL-CLRAQRCV-GGRNCHRKHVEDG  |
| <i>Quercus robur</i>        | MVG-ASQTRPEL-SLRAKRCM-GGRNCHRKHVEDG  |
| <i>Gossypium hirsutum</i>   | MRG-AWLTTPPEL-CGHGKRRI-GGRNCHRKHVEDG |
| <i>Fragaria vesca</i>       | MVG-ASLRKPEL-CIRAKRRI-GGRNCHRKHVEDG  |
| <i>Actinidia chinensis</i>  | MVR-PSFSKPEV-LGRAKSP-GGRNCHRKHVEDG   |
| <i>Arabidopsis thaliana</i> | MVG-VSPVTKL-CDRFNRSV-GGRNCHRKHVEDG   |
| <i>Populus trichocarpa</i>  | MVG-VLLTKSEF-SSRAKCKI-GGRNCHRKHVEDG  |
| <i>Nicotiana tabacum</i>    | MVG-YRFSDELLTAGKIQKPVAGGRNCHRKHVEDG  |
| <i>Oryza sativa</i>         | MRR-ARGTDAV---QRKLRGGRNCHRKHVEDG     |
| <i>Aquilegia formosa</i>    | MVK-SSQIYDDL-AGTSKKTII-AGRNCHRKHVEDG |

## C At3g15430

|                             |                                                      |
|-----------------------------|------------------------------------------------------|
| <i>Citrus clementina</i>    | MFCYFRSVYQSFVK--LASRPPLLSISYAFLLFDVFFICCNCLRFRLKI    |
| <i>Cucumis melo</i>         | MIC-FQSLYSLRLK--FFSRTPFLLYSISHIFLPSDVFFICCFNCLRFRLKN |
| <i>Ipomoea nil</i>          | -----MIIS--LNPR--FSYSILSNFVKSDVFFINCLNCLRFRLKI       |
| <i>Glycine max</i>          | -MFYFQSRFQLSPANLSSRPFFSYISISHVFLPSDVFFISCFNCLRFRLKI  |
| <i>Arabidopsis thaliana</i> | -MISFRSSNRPTAR--FSSITPFSYSISYLFPLSNVFFIHYFNCSRFRLKI  |
| <i>Vitis vinifera</i>       | -MFYFDSLHQLPVN--FSFIAPFVYSISYIFLPSDVFFICCFNCLRFRLKI  |

## D At5g27920

|                                      |                                                 |
|--------------------------------------|-------------------------------------------------|
| <i>Gossypium raimondii</i>           | MKPT-----RTTDF-----SLIRTLK--KPTHPLHLRVLFLVPT    |
| <i>Aquilegia formosa x pubescens</i> | MQARQKRFGRTREGFPLRRRLSDIE--MTTHQPLLHLRVLFLVPT   |
| <i>Quercus robur</i>                 | MNPT-----HKIRL-----SLFRTLNSNKPTEHPLL----FFLFVPT |
| <i>Jatropha curcas</i>               | MNGI-----HKTRL-----GLTRILS--KRTHHPLLHLRVLFLVPT  |
| <i>Arabidopsis thaliana</i>          | MNPK-----LOT-VN-----PIRILE--KPVHHSLLYLRAVFLFIPT |
| <i>Citrus reticulata</i>             | MNPI-----RETRFS-----IRILF--KPTHPLPLYLRLFLVPT    |

## E OTLD1

|                                      |                                                             |
|--------------------------------------|-------------------------------------------------------------|
| <i>Vitis vinifera</i>                | MRIVRGMQR---LIREEQ-APCW-NKSFGRGIDISAPKARTRD--KPML-----      |
| <i>Mimulus guttatus</i>              | MRIIDRGMQK---LNCEEQS-LVGWKNKSVTSIGIGVIAPKARTRGKLRKSPASLYI-- |
| <i>Solanum lycopersicum</i>          | MRIIFRGMQK---LVREYKT-KVSCWDKSFSSQIGIGVTAPKARKRDKFKARALFL--  |
| <i>Lactuca sativa</i>                | MRIVRGMQRSFQLVDEDDI-GWSNKIKSFTGGIGVTSAPKARTRDKSKARVL----    |
| <i>Glycine max</i>                   | MRIVRGMQR---SLCEEY-CCCNKDSFFP-GVGITAPKARTRDKLIIQTL----      |
| <i>Aquilegia formosa x pubescens</i> | MRIVRGMQR---SIFEEEQ-KKLIFEKIFSLGIGITVPKARTRDKLLVSVL----     |
| <i>Gossypium hirsutum</i>            | MRIVRGMQRLEFR--EEAN---VLGWKKSFSQIGIGITAPKARKRDK---TMSLGL-   |
| <i>Citrus sinensis</i>               | MRIVRGMQRLEFR--EELNKITLLSWKESFSQIGIGITVPKARTRDKPTNTMIFSL-   |
| <i>Ricinus communis</i>              | MRIVRGMQKLFHGEEELN---LGWKNKSFSGIGIGITVPKARTRDKPMITMVFLCL    |
| <i>Malus x domestica</i>             | MRIVRGMQR---SFPEEQS--VLGWKKTFSQIGIGITVPKARTRDKHNSKFGVL--    |
| <i>Saruma henryi</i>                 | MIIIVRGMQK---SICVGQK-VLLGWKESFSRGIGITAPKVRTRDKGI-----       |
| <i>Arabidopsis thaliana</i>          | -----MQR---TFCCEVEN-----GWKESLSQIGIVIVGPKARTRDKPWDIL----    |

**Supplementary Figure S2.** Alignments of the homology groups of the newly identified sequence-dependent CPuORFs. Amino acid sequences of the *ANAC082* (A), *CIPK6* (B), *At3g15430* (C), *At5g27920* (D), or *OTLD1* (E) CPuORFs and their putative orthologs were aligned using ClustalW2 (<http://www.ebi.ac.uk/Tools/msa/clustalw2/>), and visualized using Boxshade ver 3.21 ([http://www.ch.embnet.org/software/BOX\\_form.html](http://www.ch.embnet.org/software/BOX_form.html)).

**Supplementary Table S1.** List of primers used for cloning of the 5'-UTRs.

| Gene             | Primer name  | Direction | Primer sequence <sup>a)</sup>                      |
|------------------|--------------|-----------|----------------------------------------------------|
| <i>ANAC082</i>   | ANAC082 P1   | Forward   | 5'- <u>TCCTCTAGAG</u> TTCTGGCTCGTCCTTCA-3'         |
|                  | ANAC082 P2   | Reverse   | 5'-TCTGT <u>CGACTT</u> CCCCATTGGCGAAGAATCC-3'      |
| <i>ANAC096</i>   | ANAC096 P1   | Forward   | 5'-TCCTCTAGATTAGGAAAAATCATTTCCTTAATCACTCTCG-3'     |
|                  | ANAC096 P2   | Reverse   | 5'-TCTGT <u>CGACCAT</u> GAACTTCCCATTTGCAACAAC-3'   |
| <i>ARF4</i>      | ARF4 P1      | Forward   | 5'-TCCTCTAGAGGAGAAAGGGAGAGTGTAG-3'                 |
|                  | ARF4 P2      | Reverse   | 5'-TCTGT <u>CGACTCCG</u> CAATCTCAGTATTCAAGT-3'     |
| <i>ATMPK20</i>   | ATMPK20 P1   | Forward   | 5'-TCCTCTAGATCTCTCTCCTTTCATTTTCACTACTTC-3'         |
|                  | ATMPK20 P2   | Reverse   | 5'-TCTGT <u>CGACTTTTT</u> TGCGATTATCTTGCTGCAT-3'   |
| <i>CIPK6</i>     | CIPK6 P1     | Forward   | 5'-TCCTCTAGATCCGACGGCAAAAGGAGAA-3'                 |
|                  | CIPK6 P2     | Reverse   | 5'-TCTGT <u>CGACGTACTACT</u> ACCACCGTCA-3'         |
| <i>CIPK23</i>    | CIPK23 P1    | Forward   | 5'-TCCTCTAGATAATTTAACTTTTAAATTCCTTCCACCATCGA-3'    |
|                  | CIPK23 P2    | Reverse   | 5'-TCTGT <u>CGACGATCGT</u> GAAAGCGTTGTT-3'         |
| <i>DIC1</i>      | DIC1 P1      | Forward   | 5'-TCCTCTAGAAATCTCACCTTCTCTCCCT-3'                 |
|                  | DIC1 P2      | Reverse   | 5'-TCTGT <u>CGACGAAGCTATT</u> CCTCCTTCAG -3'       |
| <i>OTLD1</i>     | OTLD1 P1     | Forward   | 5'-TCCTCTAGACGGTTTAAAAAAAAAAAAAACATTTCTCTCA-3'     |
|                  | OTLD1 P2     | Reverse   | 5'-TCTGT <u>CGACGAGTTG</u> GGAAGAAGTGCCTGAT-3'     |
| <i>At1g67480</i> | At1g67480 P1 | Forward   | 5'-TCCTCTAGACGAAGCAGAAGACAGAACCCAA-3'              |
|                  | At1g67480 P2 | Reverse   | 5'-TCTGT <u>CGACCACATG</u> CCGTGATCACAATCCT-3'     |
| <i>At3g15430</i> | At3g15430 P1 | Forward   | 5'-TCCTCTAGATTTCAATTGTACGTTTTTCAATCGAAAG-3'        |
|                  | At3g15430 P2 | Reverse   | 5'-TCTGT <u>CGACAAACAG</u> TTTCGATCAGCCAT-3'       |
| <i>At3g55050</i> | At3g55050 P1 | Forward   | 5'-TCCTCTAGACGCGACTATCGGTTTTGATTTG-3'              |
|                  | At3g55050 P2 | Reverse   | 5'-TCTGT <u>CGACTCACTAC</u> CAGGACTAGAATCTTCT-3'   |
| <i>At4g10170</i> | At4g10170 P1 | Forward   | 5'-TCCTCTAGATCACAAAGATAAACATCTCAAACAAAAAGCTCA-3'   |
|                  | At4g10170 P2 | Reverse   | 5'-TCTGT <u>CGACACTGTG</u> TTCTTGATTAAACCCATCT-3'  |
| <i>At4g12790</i> | At4g12790 P1 | Forward   | 5'-TCCTCTAGAACAAACCAAAAAACTGAAGCTCTTGA-3'          |
|                  | At4g12790 P2 | Reverse   | 5'-TCTGT <u>CGACTTTCC</u> ACTGCCTGCT-3'            |
| <i>At5g02480</i> | At5g02480 P1 | Forward   | 5'-TCCTCTAGATAATCCAATCTTCTTACATAAACACCT-3'         |
|                  | At5g02480 P2 | Reverse   | 5'-TCTGT <u>CGACAAACAG</u> TAAGAATTGAACCTTTC-3'    |
| <i>At5g27920</i> | At5g27920 P1 | Forward   | 5'-TCCTCTAGAGAGGTTCCGTTTTGTTTTTCCCA-3'             |
|                  | At5g27920 P2 | Reverse   | 5'-GACGTCGACATTTTTGCAACAGA-3'                      |
| <i>At5g63640</i> | At5g63640 P1 | Forward   | 5'-TCCTCTAGAAATCTGATTTTAAAGGAATTAATCTCTATTTGCCA-3' |
|                  | At5g63640 P2 | Reverse   | 5'-TCTGT <u>CGACACAAGCT</u> CCGCAGCCATT-3'         |

<sup>a)</sup> The restriction sites added for cloning are underlined.

**Supplementary Table S2.** List of primers used for introduction of the frameshift mutations.

| Gene           | Type of mutation                        | Primer name                        | Direction          | Primer sequence <sup>a)</sup>                                                                                  |
|----------------|-----------------------------------------|------------------------------------|--------------------|----------------------------------------------------------------------------------------------------------------|
| <i>ANAC082</i> | 1-nt insertion                          | ANAC082 fs for1<br>ANAC082 fs rev1 | Forward<br>Reverse | 5'-GCAGGGG <b>T</b> GAGGTTGTGGT-3'<br>5'-CCACAACCTC <b>A</b> CCCCTGCT-3'                                       |
|                | 1-nt deletion                           | ANAC082 fs for2<br>ANAC082 fs rev2 | Forward<br>Reverse | 5'-CAGGCACTGACTTGACTTGTCT-3'<br>5'-GACAAGTCAAGT <b>C</b> AGTGCCTGAA-3'                                         |
| <i>ANAC096</i> | 1-nt insertion and<br>1-nt substitution | ANAC096 fs for1<br>ANAC096 fs rev1 | Forward<br>Reverse | 5'- <b>A</b> GTCACACAAAGAATACAATCGACTgGACTTGC-3'<br>5'-GTCGATTGTATTCTTTGTGTGAC <b>T</b> AAGAACATTG-3'          |
|                | 1-nt deletion                           | ANAC096 fs for2<br>ANAC096 fs rev2 | Forward<br>Reverse | 5'-AACAGTTATGCTTCGTGACTTCAAG-3'<br>5'-TGAAGTCACGAAGCATAACTGTTAATATTTGG-3'                                      |
| <i>ARF4</i>    | 1-nt insertion and<br>1-nt deletion     | ARF4 fs for1<br>ARF4 fs rev1       | Forward<br>Reverse | 5'-CCTTCTCTGAAACCCTTGTCTCAT <b>T</b> TTGATTCCT-3'<br>5'-GAACAAGGGTTTCAGAGAAGGATTCTT <b>C</b> TCTCCA-3'         |
| <i>ATMPK20</i> | 1-nt deletion                           | ATMPK20 fs for1<br>ATMPK20 fs rev1 | Forward<br>Reverse | 5'-CTCTGTCTGGTATCGATTGCCGGAGCAGAA-3'<br>5'-CTCCGGCAATCGAT <b>A</b> CCGACAGAGA-3'                               |
|                | 1-nt insertion                          | ATMPK20 fs for2<br>ATMPK20 fs rev2 | Forward<br>Reverse | 5'-GGAGTAGTG <b>T</b> GTCGATGGGGCCAAT-3'<br>5'-CAGCCGCATTGGCCCCATCGAC <b>A</b> CACTACT-3'                      |
| <i>CIPK6</i>   | 1-nt deletion                           | CIPK6 fs for1<br>CIPK6 fs rev2     | Forward<br>Reverse | 5'-AGACTAAGCTGTGTATCGGTTTAACC-3'<br>5'-AAACCGATACACAGCTTAGTCTTCA-3'                                            |
|                | 1-nt insertion                          | CIPK6 fs for2<br>CIPK6 fs rev2     | Forward<br>Reverse | 5'-TCGAGGA <b>A</b> CGGGTGATCCAGTTTTTC-3'<br>5'-AACTGGATCACCCG <b>T</b> TCTCGACGTG-3'                          |
| <i>CIPK23</i>  | 1-nt insertion and<br>1-nt deletion     | CIPK23 fs for1<br>CIPK23 fs rev1   | Forward<br>Reverse | 5'-AA <b>C</b> GAAGAAGAGGTCCT <b>C</b> TCTCGATTCA-3'<br>5'-GGAGAGGACCTCTTCT <b>C</b> TTGATGGCT-3'              |
| <i>DIC1</i>    | 1-nt insertion                          | DIC1 fs for1<br>DIC1 fs rev1       | Forward<br>Reverse | 5'-CCTGTTTATGTCTCA <b>A</b> GATCTCTGATTCCTCATT-3'<br>5'-GAGGAATCAGAGATCT <b>C</b> TTGAGACATAAACA-3'            |
|                | 1-nt deletion                           | DIC1 fs for2<br>DIC1 fs rev2       | Forward<br>Reverse | 5'-CCATTCTCATCTCTTAATCTCAGTGAGATCA-3'<br>5'-CCAGTTAGAATTGGAGCTGATCTCACTGAGATTAAGAGAT-3'                        |
| <i>OTLD1</i>   | 1-nt deletion                           | OTLD1 fs for1<br>OTLD1 fs rev1     | Forward<br>Reverse | 5'-AATGCAGAGAACGTT <b>T</b> GCTGCGA-3'<br>5'-CGCAGCAAACGTTCTCTGCATT-3'                                         |
|                | 1-nt substitution                       | OTLD1 fs for2<br>OTLD1 fs rev2     | Forward<br>Reverse | 5'-TCTCTCAAGGGATTGTTATCGTtGGTCCTAAAGCA-3'<br>5'-AGTTCTTGCTTTAGGACC <b>a</b> ACGATAACAAT-3'                     |
|                | 1-nt insertion                          | OTLD1 fs for3<br>OTLD1 fs rev3     | Forward<br>Reverse | 5'-CCTTGGGA <b>A</b> TATTCTCTAATCTTTTCATCT-3'<br>5'-TTTGCTGTCTAATCAAAGATGAAAGATTAGAGAATA <b>T</b> TCCCAAGGT-3' |

|                  |                                        |                                        |                    |                                                                                                                               |
|------------------|----------------------------------------|----------------------------------------|--------------------|-------------------------------------------------------------------------------------------------------------------------------|
| <i>At1g67480</i> | 1-nt insertion                         | At1g67480 fs for1<br>At1g67480 fs rev1 | Forward<br>Reverse | 5'-AGATTCTGCTAG <sup>A</sup> ACATCAATATTCTTCAGT-3'<br>5'-CTGAAGAATATTGATGT <sup>T</sup> CTAGCAGAATCTA-3'                      |
|                  | 1-nt deletion                          | At1g67480 fs for2<br>At1g67480 fs rev2 | Forward<br>Reverse | 5'-GAAAATCACTACTACTGACGGGTTTCA-3'<br>5'-GAAACCCGTCAGTATAGTGATTTTCA-3'                                                         |
| <i>At3g15430</i> | 1-nt insertion                         | At3g15430 fs for1<br>At3g15430 fs rev1 | Forward<br>Reverse | 5'-CGAATAGACCAA <sup>A</sup> CTGCGAGATT-3'<br>5'-TCTCGCAG <sup>T</sup> TTGGTCTATTTCG-3'                                       |
|                  | 1-nt deletion                          | At3g15430 fs for2<br>At3g15430 fs rev2 | Forward<br>Reverse | 5'-GATTTTCGCCTCAAATCTGATCCT-3'<br>5'-GGATCAGATTTGAGGCGAAATC-3'                                                                |
| <i>At3g55050</i> | 1-nt deletion                          | At3g55050 fs for1<br>At3g55050 fs rev1 | Forward<br>Reverse | 5'-AATGCGTGTTTGAATCTGAATCCTG-3'<br>5'-CAGGATTCAGATTCAAACACGCATT-3'                                                            |
|                  | 1-nt insertion                         | At3g55050 fs for2<br>At3g55050 fs rev2 | Forward<br>Reverse | 5'-TGACAAGAAGATTGGGTTTCTTCATA <sup>T</sup> ATATAGTTATAAGCA-3'<br>5'-AAATCAGTGCTTATAACTATAT <sup>A</sup> TATGAAGAAACCCAATCT-3' |
|                  | 1-nt insertion and<br>1-nt deletion    | At3g55050 fs for3<br>At3g55050 fs rev3 | Forward<br>Reverse | 5'-AACGA <sup>T</sup> TTTGATAGCTGGTTCTTTGGTTGAGA-3'<br>5'-AATTCACATGTCTCAACCAAAGAACCAGCTATCAAA <sup>A</sup> TCGTT-3'          |
| <i>At4g10170</i> | 1-nt deletion                          | At4g10170 fs for1<br>At4g10170 fs rev1 | Forward<br>Reverse | 5'-GGAATGAGAGATTCATCCTCGAT-3'<br>5'-CGAGGATGAATCTCTCATTCT-3'                                                                  |
|                  | 1-nt insertion                         | At4g10170 fs for2<br>At4g10170 fs rev2 | Forward<br>Reverse | 5'-CTCTCTTCTTCT <sup>T</sup> TGCTCTAATCACA-3'<br>5'-GTGATTAGAGCA <sup>A</sup> AAGAAGAAGAGAGA-3'                               |
| <i>At4g12790</i> | 1-nt insertion                         | At4g12790 fs for1<br>At4g12790 fs rev1 | Forward<br>Reverse | 5'-GACATTTTGAGAGTGA <sup>A</sup> TTGTTTGGTTTAG-3'<br>5'-CTAAACCAAACA <sup>T</sup> CACTCTCAAATGTC-3'                           |
|                  | 1-nt deletion and<br>1-nt substitution | At4g12790 fs for2<br>At4g12790 fs rev2 | Forward<br>Reverse | 5'-CTTTGCGTCT <sup>T</sup> aAGAATCTTTCAGTGT-3'<br>5'-AAATTAACAAATACAGTGAAAGATTCT <sup>t</sup> AAGACGCAAAGA-3'                 |
| <i>At5g02480</i> | 1-nt insertion                         | At5g02480 fs for1<br>At5g02480 fs rev1 | Forward<br>Reverse | 5'-GTTTGAGTCGGAG <sup>T</sup> TTTCCCG-3'<br>5'-CGGGAAA <sup>A</sup> CTCCGACTCAAAC-3'                                          |
|                  | 1-nt deletion                          | At5g02480 fs for2<br>At5g02480 fs rev2 | Forward<br>Reverse | 5'-GATATTGTCTCCTCTAGCAGTCTCT-3'<br>5'-AGAGACTGCTAGAGGAGACAATATC-3'                                                            |
| <i>At5G27920</i> | 1-nt insertion                         | At5G27920 fs for1<br>At5G27920 fs rev1 | Forward<br>Reverse | 5'-GCAAACCGTTA <sup>A</sup> ACCCAATTC-3'<br>5'-GAATTGGGT <sup>T</sup> TAACGGTTTGCA-3'                                         |
|                  | 1-nt deletion                          | At5G27920 fs for2<br>At5G27920 fs rev2 | Forward<br>Reverse | 5'-GCTGTGTTTCTCTTTATCCGACTTAA-3'<br>5'-TTAAGTCGGATAAAGAGAAACACAGC-3'                                                          |
| <i>At5g63640</i> | 1-nt deletion                          | At5g63640 fs for1<br>At5g63640 fs rev1 | Forward<br>Reverse | 5'-CTCAAGCTGATAGGGTTTATCA-3'<br>5'-GATAAACCC <sup>T</sup> ATCAGCTTGAG-3'                                                      |
|                  | 1-nt insertion                         | At5g63640 fs for2<br>At5g63640 fs rev2 | Forward<br>Reverse | 5'-CTCTGTCT <sup>T</sup> TTCTCAGCTTAGCA-3'<br>5'-GCTAAGCTGAGAA <sup>A</sup> GACAGAGA-3'                                       |

a) The nucleotides that were inserted in the frameshift mutants are boxed. Shaded letters denote the positions of deletion mutations, in which a nucleotide between the shaded nucleotides was deleted. Lowercase letters indicate substituted nucleotides.

**Supplementary Table S3.** List of primers used for introduction of the codon substitutions into the *ANAC082* CPuORF.

| Mutation | Primer name       | Direction | Primer sequence <sup>a)</sup>                |
|----------|-------------------|-----------|----------------------------------------------|
| ΔAUG     | ANAC082 ΔAUG1 for | Forward   | 5'-GCACACCAGAAgTCTGTTGATCT-3'                |
|          | ANAC082 ΔAUG1 rev | Reverse   | 5'-GATCAACAGACTTCTGGTGTGCAA-3'               |
|          | ANAC082 ΔAUG2 for | Forward   | 5'-GACTGTGGTTATAaGAGCAGG-3'                  |
|          | ANAC082 ΔAUG2 rev | Reverse   | 5'-CCTGCTcTATAACCACAGTCA-3'                  |
| K7A      | ANAC082 K7A for   | Forward   | 5'-CTCTGCgcGAAGAATCCATCTTTTCTTTGGTGT-3'      |
|          | ANAC082 K7A rev   | Reverse   | 5'-GATGGATTCTTCgcGCAGAGATCAACAGACA-3'        |
| K8A      | ANAC082 K8A for   | Forward   | 5'-CTCTGCAAGgcGAATCCATCTTTTCTTTGGTGTGA-3'    |
|          | ANAC082 K8A rev   | Reverse   | 5'-GATGGATTcgcCTTGCAAGATCAACAGACA-3'         |
| S11A     | ANAC082 S11A for  | Forward   | 5'-GAAGAATCCAgCTTTTCTTTGGTGTGA-3'            |
|          | ANAC082 S11A rev  | Reverse   | 5'-CACCAAAGAAAAGcTGGATTCTTCTTGCA-3'          |
| W14A     | ANAC082 W14A for  | Forward   | 5'-CCATCTTTTCTTgcGTGTGACTGTGGTTA-3'          |
|          | ANAC082 W14A rev  | Reverse   | 5'-GTCACACgcAAGAAAAGATGGATTCTTCTTGCA-3'      |
| C15A     | ANAC082 C15A for  | Forward   | 5'-CTTTTCTTTGGgcTGACTGTGGTTATATGAGCA-3'      |
|          | ANAC082 C15A rev  | Reverse   | 5'-CCACAGTCAgcCAAAGAAAAGATGGA-3'             |
| C17A     | ANAC082 C17A for  | Forward   | 5'-GGTGTGACgcTGGTTATATGAGCA-3'               |
|          | ANAC082 C17A rev  | Reverse   | 5'-CATATAACCAgcGTCACACCAAAGA-3'              |
| R22A     | ANAC082 R22A for  | Forward   | 5'-TATATGAGCgcGGGGAGGTTGTGGT-3'              |
|          | ANAC082 R22A rev  | Reverse   | 5'-AACCTCCCCgcGTCATATAACCA-3'                |
| R24A     | ANAC082 R24A for  | Forward   | 5'-AGGGGGgcGTTG TGGTGTTCAGTTA-3'             |
|          | ANAC082 R24A rev  | Reverse   | 5'-AAACACCACAACgcCCCCCTGTCAT-3'              |
| R24R     | ANAC082 R24R for  | Forward   | 5'-GAGCAGGGGGcGaTTGTGGTGTTC-3'               |
|          | ANAC082 R24R rev  | Reverse   | 5'-CACCACAAtCgCCCCCTGTCATAT-3'               |
| W26A     | ANAC082 W26A for  | Forward   | 5'-GCAGGGGAGGTTGgcGTGTTTTTCAGATTAT-3'        |
|          | ANAC082 W26A rev  | Reverse   | 5'-TCTGAAAACACgcCAACCTCCCCTGTCAT-3'          |
| C27A     | ANAC082 C27A for  | Forward   | 5'-GGGAGTTGTGGgcTTTTTCAGAT-3'                |
|          | ANAC082 C27A rev  | Reverse   | 5'-GAGGATAATCTGAAAAgcCCACAACCT-3'            |
| Q29A     | ANAC082 Q29A for  | Forward   | 5'-GGTTGTGGTGTTCgcGATTATCCTCTT-3'            |
|          | ANAC082 Q29A rev  | Reverse   | 5'-GCCTGAAGAGGATAATCgcAAAACACCACAA-3'        |
| I30A     | ANAC082 I30A for  | Forward   | 5'-GGTTGTGGTGTTCgcGATTATCCTCTT-3'            |
|          | ANAC082 I30A rev  | Reverse   | 5'-GCCTGAAGAGGATAgcCTGAAAACACCACAA-3'        |
| F33A     | ANAC082 F33A for  | Forward   | 5'-GATTATCCTCgcCAGGCACTGGACT-3'              |
|          | ANAC082 F33A rev  | Reverse   | 5'-GTGCCTGgcGAGGATAATCTGA-3'                 |
| R34A     | ANAC082 R34A for  | Forward   | 5'-TCTTCgcGCACTGGAACCTTGACTTGTCTTC-3'        |
|          | ANAC082 R34A rev  | Reverse   | 5'-GACAAGTCAAAGTTCCAGTGCgcGAAGAGGAATAA-3'    |
| R34R     | ANAC082 R34R for  | Forward   | 5'-CAGATTATCCTCTTCcGaCACTGGACTT-3'           |
|          | ANAC082 R34R rev  | Reverse   | 5'-GGAATTGAAGACAAGTCAAGTCCAGTGTcGaAGA-3'     |
| H35A     | ANAC082 H35A for  | Forward   | 5'- CCTCTTCAGGgcCTGGACTTGACTTGT-3'           |
|          | ANAC082 H35A rev  | Reverse   | 5'-CGAGGAATTGAAGACAAGTCAAGTCCAGgcCCTGAAGA-3' |
| W36A     | ANAC082 W36A for  | Forward   | 5'-AGGCACgcGACTTGACTTGTCTTCAAT-3'            |
|          | ANAC082 W36A rev  | Reverse   | 5'-CAAGTCAAGTCgcGTGCCTGAAGAG-3'              |
| T37A     | ANAC082 T37A for  | Forward   | 5'-AGGCACTGGcCTTGACTTGTC-3'                  |
|          | ANAC082 T37A rev  | Reverse   | 5'-CAAGTCAAGcCCAGTGCCTGAA-3'                 |

<sup>a)</sup> Lowercase letters indicate substituted nucleotides.

**Supplementary Table S4.** List of primers used for introduction of the codon substitutions into the *CIPK6* CPuORF.

| Mutation | Primer name                      | Direction | Primer sequence <sup>a)</sup>      |
|----------|----------------------------------|-----------|------------------------------------|
| ΔAUG     | CIPK6 ΔAUG for<br>CIPK6 ΔAUG rev | Forward   | 5'-TGCAGAGAGAaGGTCGGAGTA-3'        |
|          |                                  | Reverse   | 5'-ACTCCGACCTTCTCTCTGCATT-3'       |
| S5A      | CIPK6 S5A for<br>CIPK6 S5A rev   | Forward   | 5'-GTCGGAGTAgCGCCGGTGAA-3'         |
|          |                                  | Reverse   | 5'-CACCGGCGcTACTCCGACCA-3'         |
| K8A      | CIPK6 K8A for<br>CIPK6 K8A rev   | Forward   | 5'-CGCCGGTGgcGACTAAGCTGTGTGA-3'    |
|          |                                  | Reverse   | 5'-GCTTAGTCgcCACCGGCGATACTC-3'     |
| L11A     | CIPK6 L11A for<br>CIPK6 L11A rev | Forward   | 5'-GAAGACTAAGgcGTGTGATCGGTTTAAC-3' |
|          |                                  | Reverse   | 5'-CCGATCACACgcCTTAGTCTTCAC-3'     |
| R14A     | CIPK6 R14A for<br>CIPK6 R14A rev | Forward   | 5'-GCTGTGTGATgcGTTTAACCGATCCGTC-3' |
|          |                                  | Reverse   | 5'-CGGTTAAACgcATCACACAGCTTAGTC-3'  |
| R17A     | CIPK6 R17A for<br>CIPK6 R17A rev | Forward   | 5'-CGGTTTAACgcATCCGTCGGC-3'        |
|          |                                  | Reverse   | 5'-CGACGGATgcGTTAAACCGATC-3'       |
| G20A     | CIPK6 G20A for<br>CIPK6 G20A rev | Forward   | 5'-GATCCGTCGcCGGCAGGAAT-3'         |
|          |                                  | Reverse   | 5'-ATTCCTGCCGGCGACGGATC-3'         |
| G21A     | CIPK6 G21A for<br>CIPK6 G21A rev | Forward   | 5'-CGTCGGCGcCAGGAATTGCCA-3'        |
|          |                                  | Reverse   | 5'-CAATTCCTGgCGCCGACGGAT-3'        |
| R22A     | CIPK6 R22A for<br>CIPK6 R22A rev | Forward   | 5'-GGCGGcgcGAATTGCCACC-3'          |
|          |                                  | Reverse   | 5'-TGGCAATTCgcGCCGCCGAC-3'         |
| R22R     | CIPK6 R22R for<br>CIPK6 R22R rev | Forward   | 5'-GGCGGCcGcAATTGCCACC-3'          |
|          |                                  | Reverse   | 5'-TGGCAATTgCgGCCGCCGAC-3'         |
| R26A     | CIPK6 R26A for<br>CIPK6 R26A rev | Forward   | 5'-GGAAATTGCCACgcGAAACACGTC-3'     |
|          |                                  | Reverse   | 5'-ACGTGTTTCgcGTGGCAATTCCTG-3'     |
| R26R     | CIPK6 R26R for<br>CIPK6 R26R rev | Forward   | 5'-GGAAATTGCCACaGaAAACACGTC-3'     |
|          |                                  | Reverse   | 5'-ACGTGTTTtCTtTGGCAATTCCTG-3'     |
| K27A     | CIPK6 K27A for<br>CIPK6 K27A rev | Forward   | 5'-TGCCACCGGgcACACGTCGAG-3'        |
|          |                                  | Reverse   | 5'-TCGACGTGTgcCCGGTGGCAAT-3'       |
| H28A     | CIPK6 H28A for<br>CIPK6 H28A rev | Forward   | 5'-CACCGGAAAgcCGTCGAGGAC-3'        |
|          |                                  | Reverse   | 5'-TCCTCGACGgcTTCCGGTGGCAA-3'      |
| V29A     | CIPK6 V29A for<br>CIPK6 V29A rev | Forward   | 5'-CGGAAACACGcCGAGGACGGGT-3'       |
|          |                                  | Reverse   | 5'-CGTCCTCGgCGTGTTCGGT-3'          |
| E30A     | CIPK6 E30A for<br>CIPK6 E30A rev | Forward   | 5'-AAACACGTCgcGGACGGGTGAT-3'       |
|          |                                  | Reverse   | 5'-CACCCGTCCgcGACGTGTTTC-3'        |
| D31A     | CIPK6 D31A for<br>CIPK6 D31A rev | Forward   | 5'-ACGTCGAGGcCGGGTGATCCA-3'        |
|          |                                  | Reverse   | 5'-ATCACCCGgCCTCGACGTGTT-3'        |
| G32A     | CIPK6 G32A for<br>CIPK6 G32A rev | Forward   | 5'-GTCGAGGACGcGTGATCCAGTT-3'       |
|          |                                  | Reverse   | 5'-CTGGATCACgCGTCTCTGACGT-3'       |

<sup>a)</sup> Lowercase letters indicate substituted nucleotides.

**Supplementary Table S5.** List of primers used for introduction of the codon substitutions into the *At3g15430* CPuORF.

| Mutation | Primer name        | Direction | Primer sequence <sup>a)</sup>            |
|----------|--------------------|-----------|------------------------------------------|
| ΔAUG     | AT3G15430 ΔAUG for | Forward   | 5'-CCCTTCTCAaGATTAGTTTCCGA-3'            |
|          | AT3G15430 ΔAUG rev | Reverse   | 5'-CGGAAACTAATcTGAGAAGGGT-3'             |
| S6A      | AT3G15430 S6A for  | Forward   | 5'-GTTTCCGAgCTTCCAATAGACCAA-3'           |
|          | AT3G15430 S6A rev  | Reverse   | 5'-GGTCTATTGGAAGcTCGGAAACT-3'            |
| R13A     | AT3G15430 R13A for | Forward   | 5'-CTGCGgcATTCTCATCTATAACTCCGTTTTCCTA-3' |
|          | AT3G15430 R13A rev | Reverse   | 5'-GAGTTATAGATGAGAATgcCGCAGTTGGTCTA-3'   |
| S16A     | AT3G15430 S16A for | Forward   | 5'-CGAGATTCTCgCTATAACTCCGTTTTCCTA-3'     |
|          | AT3G15430 S16A rev | Reverse   | 5'-CGGAGTTATAGcTGAGAATCTCGCA-3'          |
| P19A     | AT3G15430 P19A for | Forward   | 5'-GATTCTCATCTATAACTgCGTTTTCCTATTCGA-3'  |
|          | AT3G15430 P19A rev | Reverse   | 5'-GGAAAACGcAGTTATAGATGAGAATCTC-3'       |
| F20A     | AT3G15430 F20A for | Forward   | 5'-CTCCGgcTTCTATTCGATTTCTTATCTCT-3'      |
|          | AT3G15430 F20A rev | Reverse   | 5'-GAAATCGAATAGGAAgcCGGAGTTATAGATGAGA-3' |
| Y22A     | AT3G15430 Y22A for | Forward   | 5'-CCGTTTTCCgcTTGATTTCTTATCTCTTTCTA -3'  |
|          | AT3G15430 Y22A rev | Reverse   | 5'-GATAAGAAATCGAAgcGGAAAACGGAGTTA-3'     |
| S23A     | AT3G15430 S23A for | Forward   | 5'-CCGTTTTCTATgCGATTTCTTATCTCTTTCTA-3'   |
|          | AT3G15430 S23A rev | Reverse   | 5'-GAGATAAGAAATCGcATAGGAAAACGGAGTTA-3'   |
| I24A     | AT3G15430 I24A for | Forward   | 5'-GTTTTCTATTCGgcTTCTTATCTCTTTCTA-3'     |
|          | AT3G15430 I24A rev | Reverse   | 5'-TAGAAAGAGATAAGAAgcCGAATAGGAAAAC-3'    |
| F28A     | AT3G15430 F28A for | Forward   | 5'-CGATTTCTTATCTCgcTCTACCATCCAA-3'       |
|          | AT3G15430 F28A rev | Reverse   | 5'-TTGGATGGTAGAgcGAGATAAGAAATCG-3'       |
| S31A     | AT3G15430 S31A for | Forward   | 5'-CTCTTTCTACCAgCCAACGTGTTTC-3'          |
|          | AT3G15430 S31A rev | Reverse   | 5'-GAACACGTTGgcTGGTAGAAAGAG-3'           |
| N32A     | AT3G15430 N32A for | Forward   | 5'-TCTACCATCCgcCGTGTTCAT-3'              |
|          | AT3G15430 N32A rev | Reverse   | 5'-ATGAAGAACACGgcGGATGGTAGA-3'           |
| F34A     | AT3G15430 F34A for | Forward   | 5'-TCCAACGTGgcCTTCATACATTACTTCAA-3'      |
|          | AT3G15430 F34A rev | Reverse   | 5'-AAGTAATGTATGAAGgcCACGTTGGATGG-3'      |
| I36A     | AT3G15430 I36A for | Forward   | 5'-CCAACGTGTTCTTCgcACATTACTTC-3'         |
|          | AT3G15430 I36A rev | Reverse   | 5'-GAAGTAATGTgcGAAGAACACGTTGG-3'         |
| N40A     | AT3G15430 N40A for | Forward   | 5'-CTTCATACATTACTTCgcTTGCTCTCGATTT-3'    |
|          | AT3G15430 N40A rev | Reverse   | 5'-AAATCGAGAGCAAgcGAAGTAATGTATGAAG-3'    |
| R43A     | AT3G15430 R43A for | Forward   | 5'-CTTCAATTGCTCTgcATTTTCGCTCAA-3'        |
|          | AT3G15430 R43A rev | Reverse   | 5'-TTGAGGCGAAATgcAGAGCAATTGAAG-3'        |
| R43R     | AT3G15430 R43R for | Forward   | 5'-CTTCAATTGCTCTaGgTTTCGCTCAA-3'         |
|          | AT3G15430 R43R rev | Reverse   | 5'-TTGAGGCGAAAaCtAGAGCAATTGAAG-3'        |
| R45A     | AT3G15430 R45A for | Forward   | 5'-TGCTCTCGATTTgcCCTCAAAATCTG-3'         |
|          | AT3G15430 R45A rev | Reverse   | 5'-CAGATTTTGAGGgcAAATCGAGAGCA-3'         |
| R45R     | AT3G15430 R45R for | Forward   | 5'-TGCTCTCGATTTaGaCTCAAAATCTG-3'         |
|          | AT3G15430 R45R rev | Reverse   | 5'-CAGATTTTGAGtCtAAATCGAGAGCA-3'         |
| H48A     | AT3G15430 H48A for | Forward   | 5'-TCGCCTCAAAgeCTGATCCTCTAGT-3'          |
|          | AT3G15430 H48A rev | Reverse   | 5'-ACTAGAGGATCAGgcTTGAGGCGA-3'           |

<sup>a)</sup> Lowercase letters indicate substituted nucleotides.

**Supplementary Table S6.** List of primers used for introduction of the codon substitutions into the *At5g27920* CPuORF.

| Mutation | Primer name                              | Direction | Primer sequence <sup>a)</sup>                           |
|----------|------------------------------------------|-----------|---------------------------------------------------------|
| ΔAUG     | AT5G27920 ΔAUG for<br>AT5G27920 ΔAUG rev | Forward   | 5'-TCGGCGTGAaGAACCCGAAA-3'                              |
|          |                                          | Reverse   | 5'-TCGGGTTCtTCACGCCGATT-3'                              |
| T7A      | AT5G27920 T7A for<br>AT5G27920 T7A rev   | Forward   | 5'-CTGCAA <sub>g</sub> CCGTTAACCCAA-3'                  |
|          |                                          | Reverse   | 5'-GGGTTAACG <sub>Gc</sub> TTGCAGTTTC-3'                |
| P10A     | AT5G27920 P10A for<br>AT5G27920 P10A rev | Forward   | 5'-GCAAACCGTTAAC <sub>g</sub> CAATTCGGATC-3'            |
|          |                                          | Reverse   | 5'-CCGAATTG <sub>c</sub> GTTAACGGTTTGCA-3'              |
| I11A     | AT5G27920 I11A for<br>AT5G27920 I11A rev | Forward   | 5'-CCGTTAACCCAgcTCGGATCTTAGAAAAAC-3'                    |
|          |                                          | Reverse   | 5'-GATCCGAgcTGGGTAAACGGTTTGCA-3'                        |
| R12A     | AT5G27920 R12A for<br>AT5G27920 R12A rev | Forward   | 5'-CCCAATT <sub>g</sub> cGATCTTAGAAAAACCGTTCA-3'        |
|          |                                          | Reverse   | 5'-GGTTTTTCTAAGATC <sub>g</sub> cAATTGGGTAAACGGTT-3'    |
| L14A     | AT5G27920 L14A for<br>AT5G27920 L14A rev | Forward   | 5'-CGGATC <sub>g</sub> cAGAAAAACCGGTTACCA-3'            |
|          |                                          | Reverse   | 5'-CCGGTTTTTCT <sub>g</sub> cGATCCGAATTGGGTAA-3'        |
| K16A     | AT5G27920 K16A for<br>AT5G27920 K16A rev | Forward   | 5'-GGATCTTAGAA <sub>g</sub> cACCGTTACCA-3'              |
|          |                                          | Reverse   | 5'-GAACCGGT <sub>g</sub> cTTCTAAGATCCGAA-3'             |
| H19A     | AT5G27920 H19A for<br>AT5G27920 H19A rev | Forward   | 5'-GAAAAACCGGTT <sub>g</sub> cCCACTCTCTACT-3'           |
|          |                                          | Reverse   | 5'-GAGAGTGG <sub>g</sub> cAACCGTTTTTCT-3'               |
| S21A     | AT5G27920 S21A for<br>AT5G27920 S21A rev | Forward   | 5'-GTTACCAC <sub>g</sub> cTCTACTCTATCT-3'               |
|          |                                          | Reverse   | 5'-GATAGAGTAGAG <sub>c</sub> GTGGTGAAC-3'               |
| L22A     | AT5G27920 L22A for<br>AT5G27920 L22A rev | Forward   | 5'-CACCCTCT <sub>g</sub> cACTCTATCTCCGAGCTGT-3'         |
|          |                                          | Reverse   | 5'-GGAGATAGAGT <sub>g</sub> cAGAGTGGTGAACC-3'           |
| L23A     | AT5G27920 L23A for<br>AT5G27920 L23A rev | Forward   | 5'-CCTCTCTA <sub>g</sub> cCTATCTCCGAGCTGTGT-3'          |
|          |                                          | Reverse   | 5'-CGGAGATAG <sub>g</sub> cTAGAGAGTGGTGAACC-3'          |
| R26A     | AT5G27920 R26A for<br>AT5G27920 R26A rev | Forward   | 5'-CTACTCTATCTC <sub>g</sub> cAGCTGTGTTTCT-3'           |
|          |                                          | Reverse   | 5'-GAAACACAGCT <sub>g</sub> cGAGATAGAGTAGA-3'           |
| R26R     | AT5G27920 R26R for<br>AT5G27920 R26R rev | Forward   | 5'-ACTCTATCTCaGgGCTGTGTTTCTCT-3'                        |
|          |                                          | Reverse   | 5'-ACACAGCcCTGAGATAGAGTAGAGA-3'                         |
| F29A     | AT5G27920 F29A for<br>AT5G27920 F29A rev | Forward   | 5'-GAGCTGTG <sub>g</sub> cTCTTTTATTCCGACTTA-3'          |
|          |                                          | Reverse   | 5'-CGGAATAAAGAGAgcCACAGCTCGGA-3'                        |
| F31A     | AT5G27920 F31A for<br>AT5G27920 F31A rev | Forward   | 5'-CTGTGTTTCTC <sub>g</sub> cTATTCGACTTAAAAAAAAGCTTC-3' |
|          |                                          | Reverse   | 5'-GTCGGAATAgcGAGAAACACAGCTC-3'                         |
| P33A     | AT5G27920 P33A for<br>AT5G27920 P33A rev | Forward   | 5'-GCTGTGTTTCTCTTTATTgCGACTTAA-3'                       |
|          |                                          | Reverse   | 5'-GTCGcAATAAAGAGAAACACAGCT-3'                          |
| T34A     | AT5G27920 T34A for<br>AT5G27920 T34A rev | Forward   | 5'-CTCTTTATTCGgCTTAAAAAAAAGCTTC-3'                      |
|          |                                          | Reverse   | 5'-GAAGCTTTTTTTTTAAGcCGGAATAAAGAG-3'                    |

<sup>a)</sup> Lowercase letters indicate substituted nucleotides.

**Supplementary Table S7.** List of primers used for introduction of the codon substitutions into the *OTLD1* CPuORF.

| Mutation | Primer name    | Direction | Primer sequence <sup>a)</sup>       |
|----------|----------------|-----------|-------------------------------------|
| ΔAUG     | OTLD1 ΔAUG for | Forward   | 5'-CCGGGAAaGCAGAGAACGTT-3'          |
|          | OTLD1 ΔAUG rev | Reverse   | 5'-GTTCTCTGcTTCCCCGGAGAT-3'         |
| E8A      | OTLD1 E8A for  | Forward   | 5'-TGCTGCGcGGTGGAGAAC-3'            |
|          | OTLD1 E8A rev  | Reverse   | 5'-GTTCTCCACCgCGCAGCAA-3'           |
| W13A     | OTLD1 W13A for | Forward   | 5'-GAGAACGGTgcGAAGGAATCC-3'         |
|          | OTLD1 W13A rev | Reverse   | 5'-GATTCCTTcgcACCGTTCTCC-3'         |
| S16A     | OTLD1 S16A for | Forward   | 5'-TGGAAGGAAgcCCTCTCTCAAGGGA-3'     |
|          | OTLD1 S16A rev | Reverse   | 5'-TCCCTTGAGAGAGGgcTTCCTTCCA-3'     |
| S18A     | OTLD1 S18A for | Forward   | 5'-GGAATCCCTcGCTCAAGGGATT-3'        |
|          | OTLD1 S18A rev | Reverse   | 5'-AATCCCTTGAGcGAGGGATTCC-3'        |
| G20A     | OTLD1 G20A for | Forward   | 5'-CCTCTCTCAAGcGATTGTTATCGTA-3'     |
|          | OTLD1 G20A rev | Reverse   | 5'-TACGATAACAATcGCTTGAGAGAGG-3'     |
| I21A     | OTLD1 I21A for | Forward   | 5'-TCTCAAGGGgcTGTTATCGTAGGTCCTAA-3' |
|          | OTLD1 I21A rev | Reverse   | 5'-TTAGGACCTACGATAACAgcCCCTTGAGA-3' |
| I23A     | OTLD1 I23A for | Forward   | 5'-AGGGATTGTTgcCGTAGGTCCTAAAGCAA-3' |
|          | OTLD1 I23A rev | Reverse   | 5'-GGACCTACGgcAACAATCCCTTGA-3'      |
| K27A     | OTLD1 K27A for | Forward   | 5'-GTAGGTCCTgcAGCAAGAAGTAGG-3'      |
|          | OTLD1 K27A rev | Reverse   | 5'-CTAGTTCTTGCTgcAGGACCTACG-3'      |
| R29A     | OTLD1 R29A for | Forward   | 5'-GTCCTAAAGCAgcAACTAGGGACAAA-3'    |
|          | OTLD1 R29A rev | Reverse   | 5'-TTTGTCCCTAGTTgcTGCTTTAGGAC-3'    |
| R29R     | OTLD1 R29A for | Forward   | 5'-GTCCTAAAGCAcGcACTAGGGACAAA-3'    |
|          | OTLD1 R29A rev | Reverse   | 5'-TTTGTCCCTAGTgCgTGCTTTAGGAC-3'    |
| R31A     | OTLD1 R31A for | Forward   | 5'-AAAGCAAGAAGTgcGGACAAACCTTG-3'    |
|          | OTLD1 R31A rev | Reverse   | 5'-AACGGTTTGTCCgcAGTTCTTGCTTT-3'    |
| R31R     | OTLD1 R31R for | Forward   | 5'-AAAGCAAGAAGTcGaGACAAACCTTGG-3'   |
|          | OTLD1 R31R rev | Reverse   | 5'-CCAAGTTTGTCTcGAGTTCTTGCTTT-3'    |
| K33A     | OTLD1 K33A for | Forward   | 5'-CTAGGGACgcACCTTGGGATAT-3'        |
|          | OTLD1 K33A rev | Reverse   | 5'-CCAAGGTgcGTCCCTAGTTC-3'          |
| L38A     | OTLD1 L38A F   | Forward   | 5'-AACCTTGGGATATTgcCTAATCTTTCATC-3' |
|          | OTLD1 L38A R   | Reverse   | 5'-GATGAAAGATTAGgcAATATCCCAAGGTT-3' |

<sup>a)</sup> Lowercase letters indicate substituted nucleotides.

**Supplementary Table S8.** List of primers used for generation of the other mutants of the *OTLD1* CPuORF.

| Construct  | Primer name                      | Direction          | Primer sequence <sup>a)</sup>                                                                          | Template                                                                 |
|------------|----------------------------------|--------------------|--------------------------------------------------------------------------------------------------------|--------------------------------------------------------------------------|
| ΔPWDI      | DPWDI for<br>DPWDI rev           | Forward<br>Reverse | 5'- TAAAGCAAGAACTAGGGACAAACTCTAATCTTTCATCTTTGA-3'<br>5'- TAAATCAAAGATGAAAGATTAGAGTTTGTCCTAGTTCTTGCT-3' | 35S:: <i>OTLD1</i> -UTR(WT):RLUC                                         |
| ΔWDIL      | DWDIL for<br>DWDIL rev           | Forward<br>Reverse | 5'-GGGACAAACCTTAATCTTTCATCTTTGATTAGGACAGCA-3'<br>5'-CAAAGATGAAAGATTAAGGTTTGTCCTAGTTCTTGCTT-3'          | 35S:: <i>OTLD1</i> -UTR(WT):RLUC                                         |
| ΔPWDIL     | DPWDIL for<br>DPWDIL rev         | Forward<br>Reverse | 5'-GAACTAGGGACAAATAATCTTTCATCTTTGATTAGGACAGCA-3'<br>5'-CAAAGATGAAAGATTAATTTGTCCTAGTTCTTGCTTTAGGA-3'    | 35S:: <i>OTLD1</i> -UTR(WT):RLUC                                         |
| fs2        | OTLD1 fs2 for<br>OTLD1 fs2 rev   | Forward<br>Reverse | 5'-CTAGGGAC <sup>A</sup> AAAACCTGGGATA-3'<br>5'-CCCAAGGTTT <sup>T</sup> GTCCCTAGTTCT-3'                | 35S:: <i>OTLD1</i> -UTR(WT):RLUC<br>35S:: <i>OTLD1</i> -UTR(fs):RLUC     |
| fs2 ΔPWDI  | fs2 DPWDI for<br>fs2 DPWDI rev   | Forward<br>Reverse | 5'-GCAAGAACTAGGGAC <sup>A</sup> AAACTCTA-3'<br>5'-TAGAGTTT <sup>T</sup> GTCCCTAGTTCTTGCT-3'            | 35S:: <i>OTLD1</i> -UTR(ΔPWDI):RLUC<br>35S:: <i>OTLD1</i> -UTR(fs):RLUC  |
| fs2 ΔWDIL  | fs2 DWDIL for<br>fs2 DWDIL rev   | Forward<br>Reverse | 5'-GCAAGAACTAGGGAC <sup>A</sup> AAACCTTAATCT-3'<br>5'-GGTTT <sup>T</sup> GTCCCTAGTTCTTGCT-3'           | 35S:: <i>OTLD1</i> -UTR(ΔWDIL):RLUC<br>35S:: <i>OTLD1</i> -UTR(fs):RLUC  |
| fs2 ΔPWDIL | fs2 DPWDIL for<br>fs2 DPWDIL rev | Forward<br>Reverse | 5'-GCAAGAACTAGGGAC <sup>A</sup> AAATAATCTTTCA-3'<br>5'-GAAAGATTATT <sup>T</sup> GTCCCTAGTTCTTGCT-3'    | 35S:: <i>OTLD1</i> -UTR(ΔPWDIL):RLUC<br>35S:: <i>OTLD1</i> -UTR(fs):RLUC |
| Stop39A    | Stop39A for<br>Stop39A rev       | Forward<br>Reverse | 5'-GGGATATTCTC <sub>gc</sub> ATCTTTCATCTTTG-3'<br>5'-GATGAAAGAT <sub>gc</sub> GAGAATATCCCAAG-3'        | 35S:: <i>OTLD1</i> -UTR(WT):RLUC                                         |
| fs Stop39A | fs Stop39A for<br>fs Stop39A rev | Forward<br>Reverse | 5'-GGGAATATTCTC <sub>gc</sub> ATCTTTCATCTTTG-3'<br>5'-GATGAAAGAT <sub>gc</sub> GAGAATATCCCAAG-3'       | 35S:: <i>OTLD1</i> -UTR(fs):RLUC                                         |

<sup>a)</sup> The nucleotides that were inserted in the frameshift mutants are boxed. Shaded letters denote the positions of deletion mutations, in which sequences between the shaded nucleotides were deleted. Lowercase letters indicate substituted nucleotides.
